# Supplementary material for: c-MYC Protein Stability Is Sustained by MAPKs in Colorectal Cancer
Source: MDPI journal article supplement (doi:10.3390/cancers14194840), 2022-10-04

Supplementary Figure S1

**a**

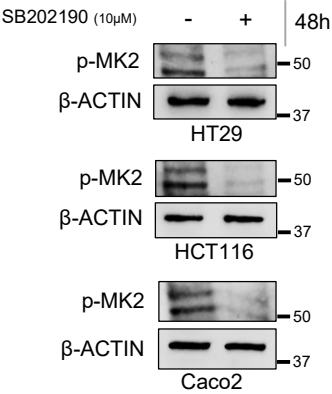

**b**

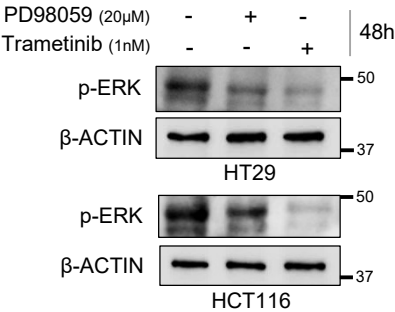

## Supplementary Figure S2

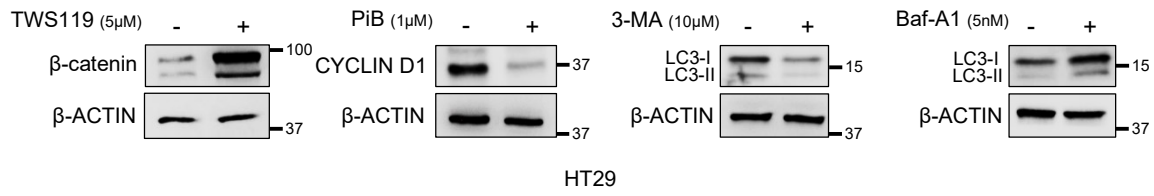

Supplementary Figure S3

a

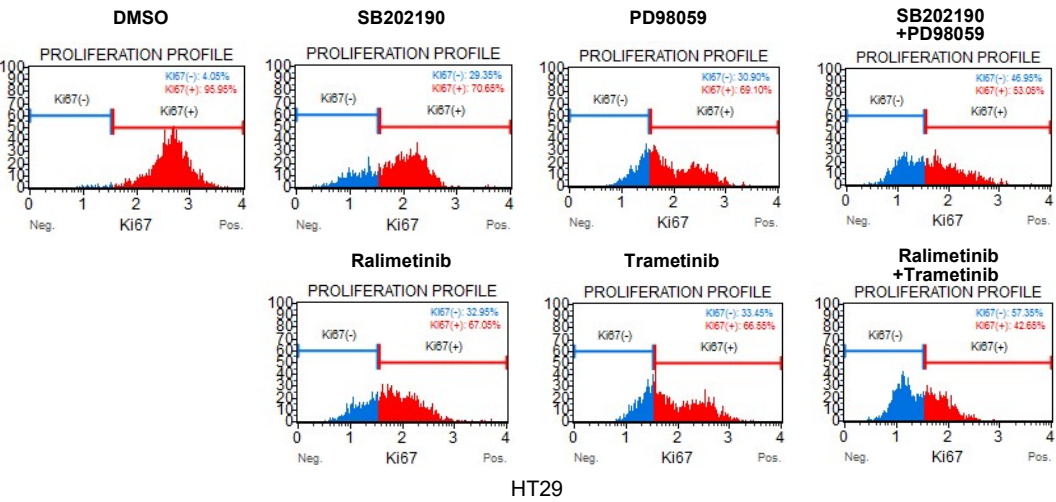

b

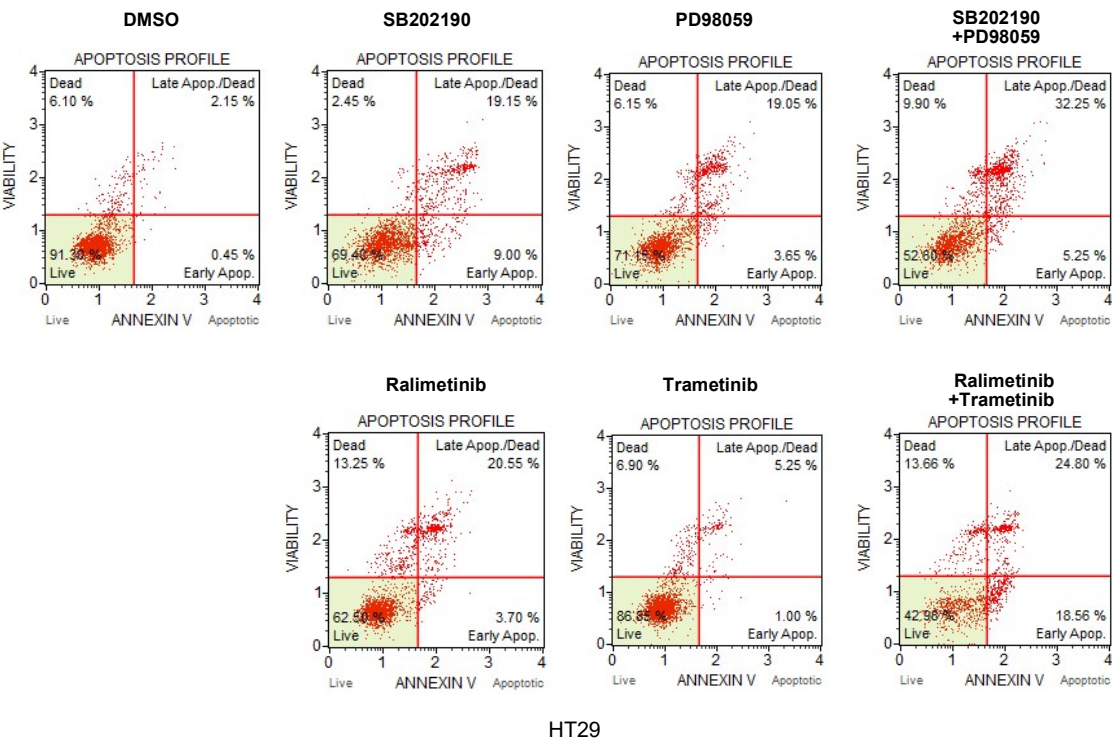

Figure 1 Original blots

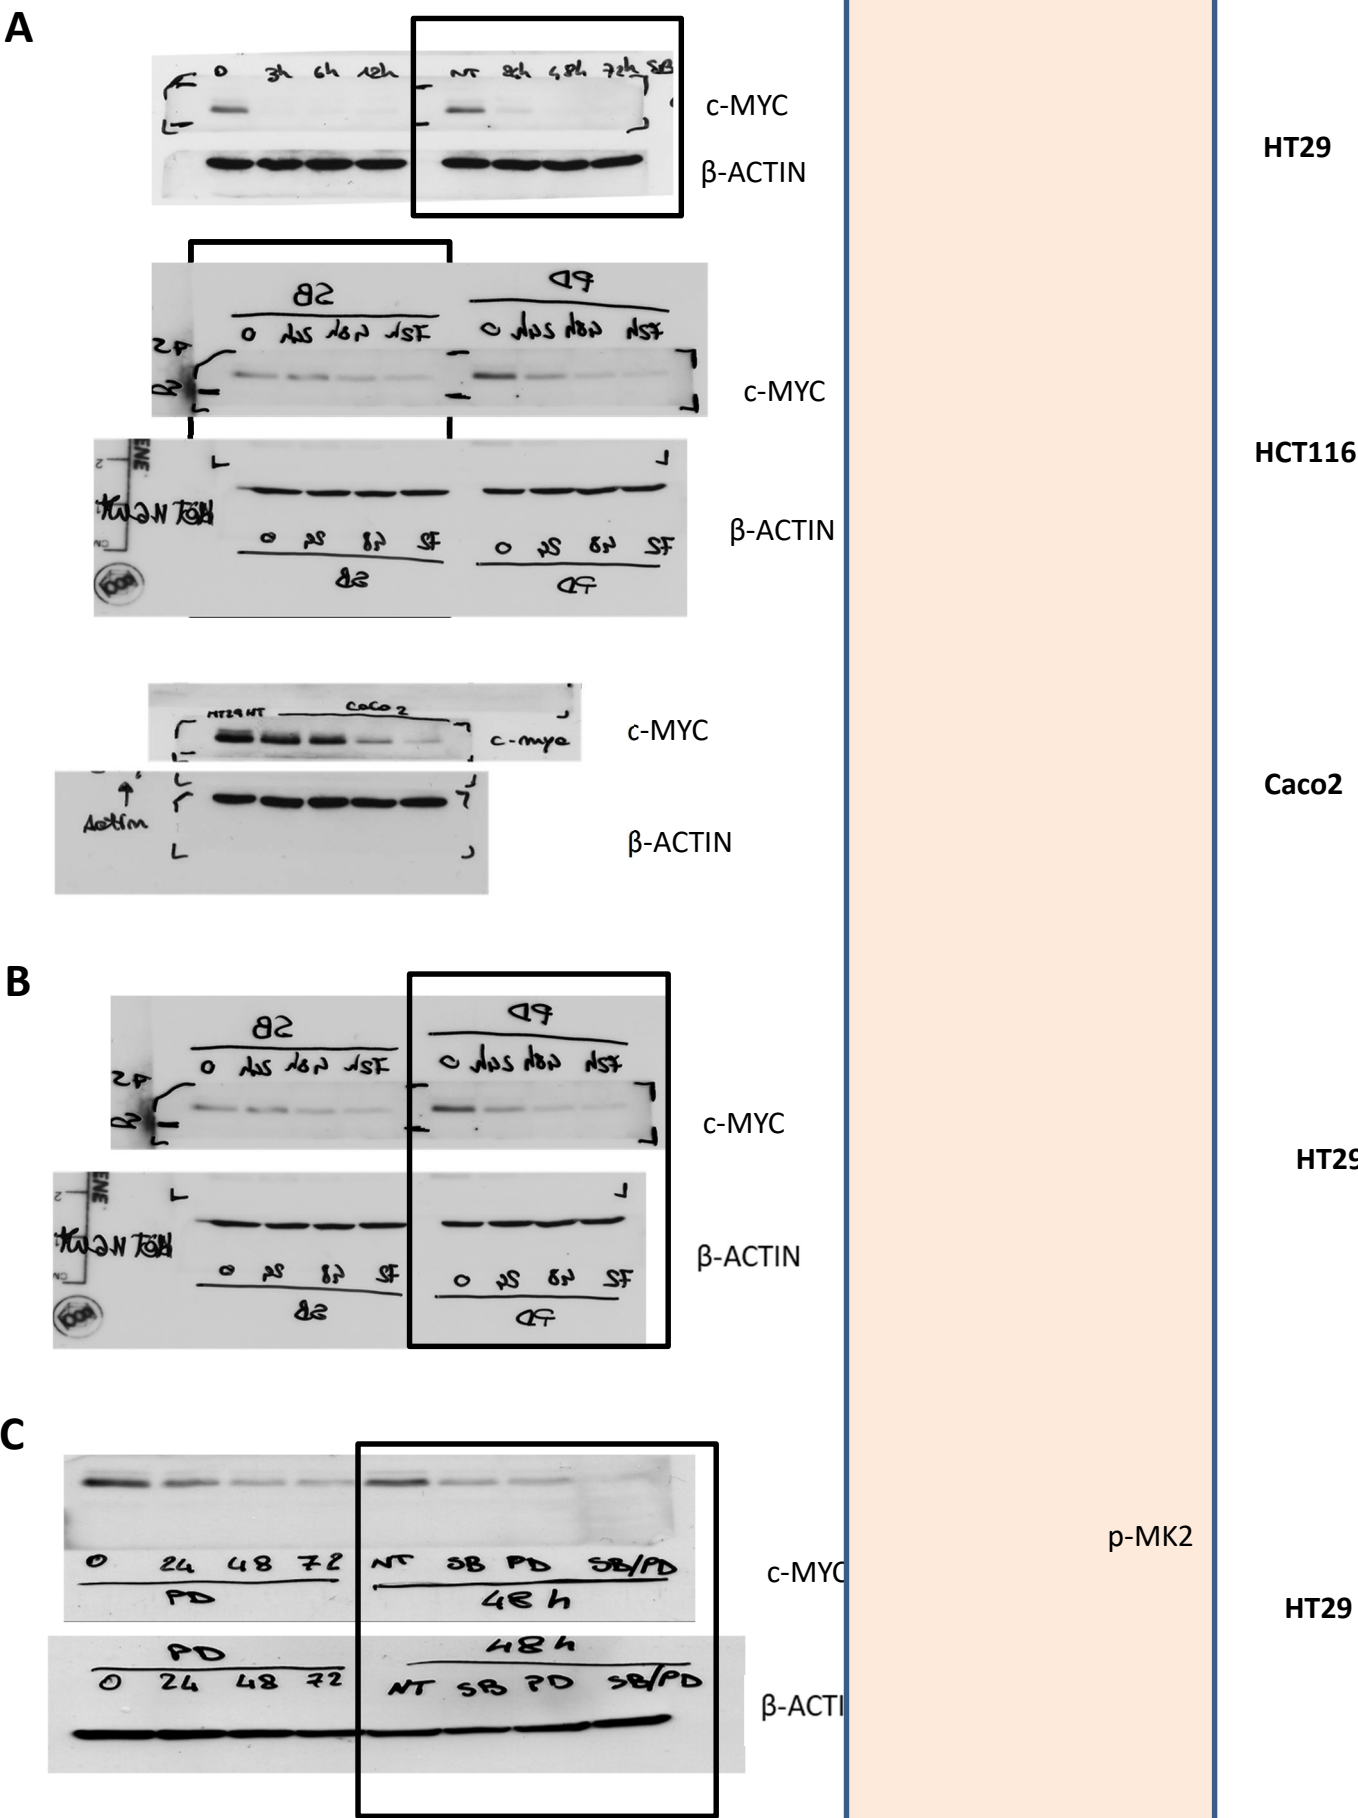

Figure 1 Original blots

D

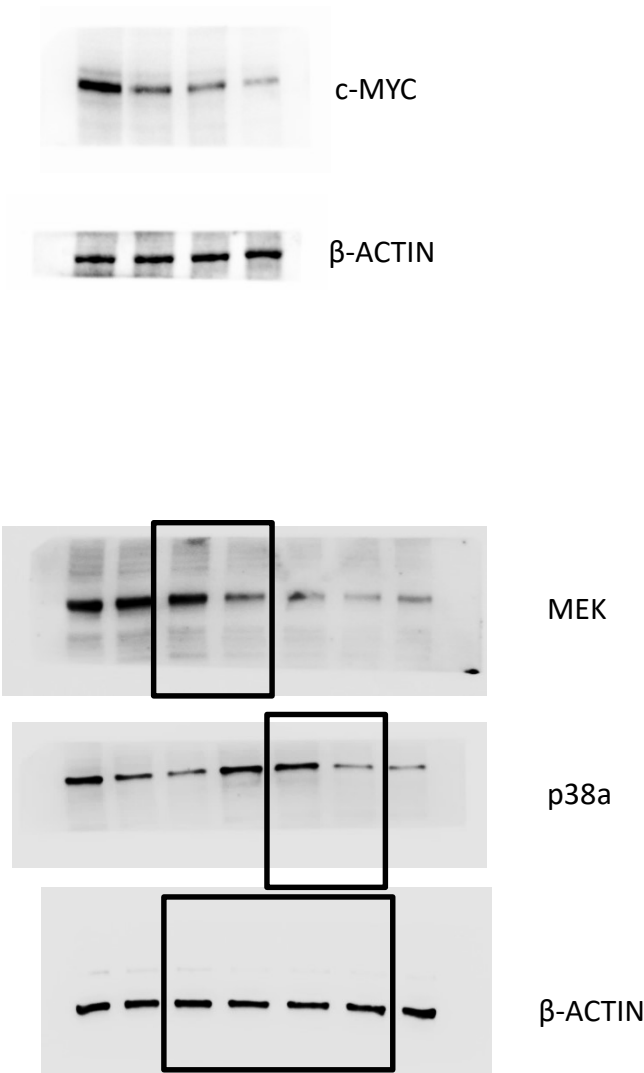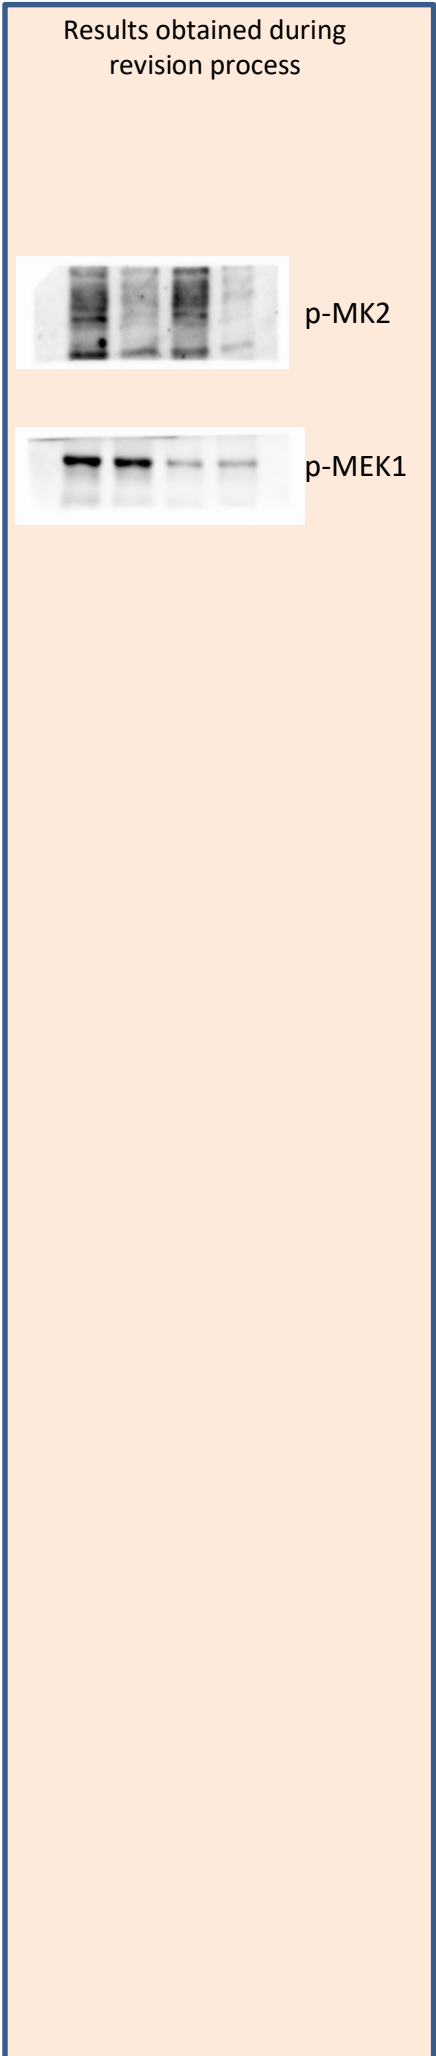

Figure 2 Original blots

A

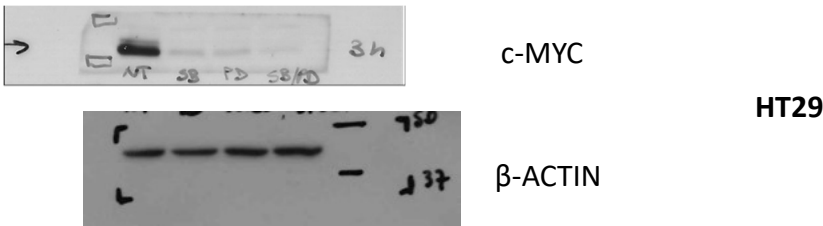

B

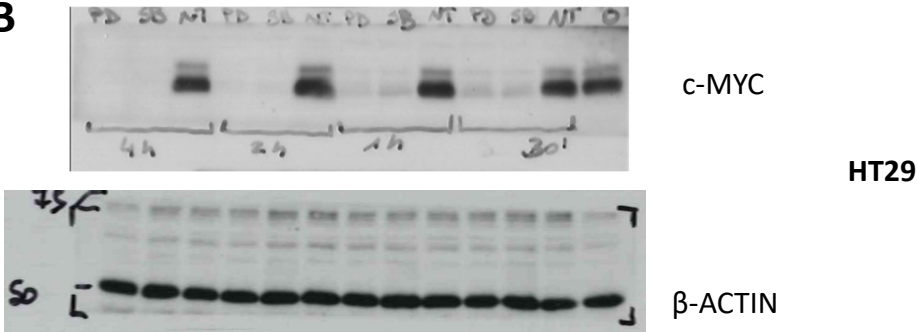

C

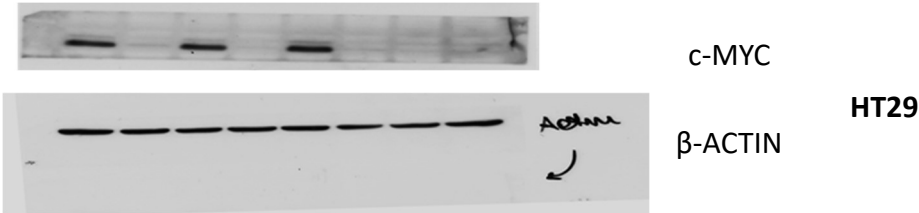

D

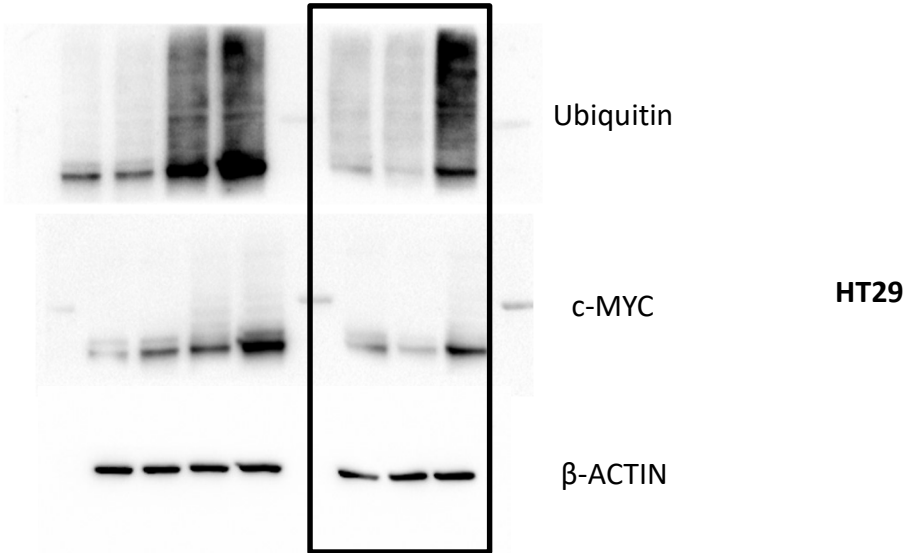

**Figure 3 Original blots**

**A**

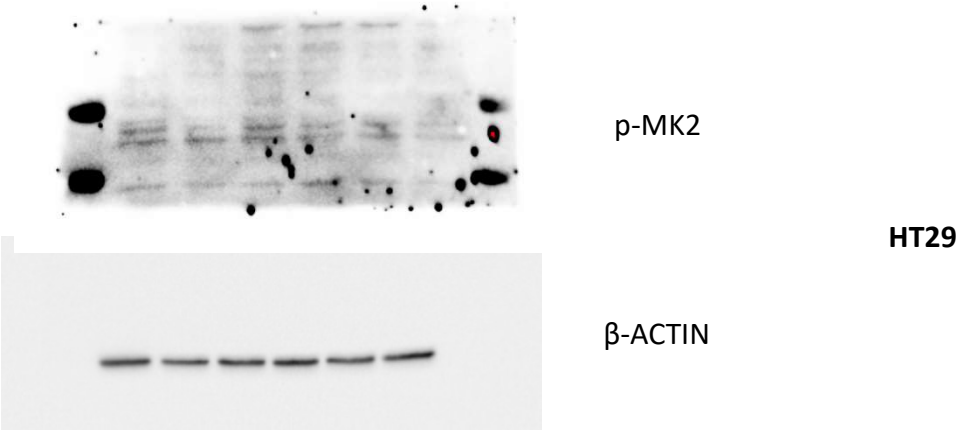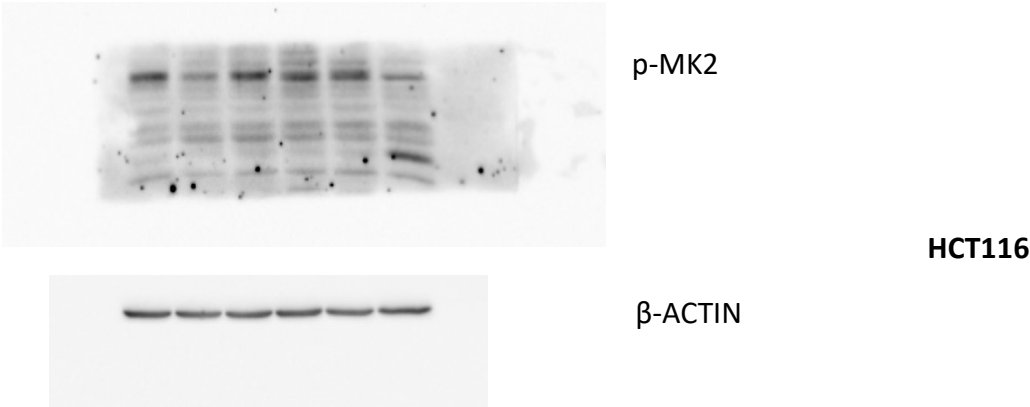

**Figure 4 Original blots**

**A**

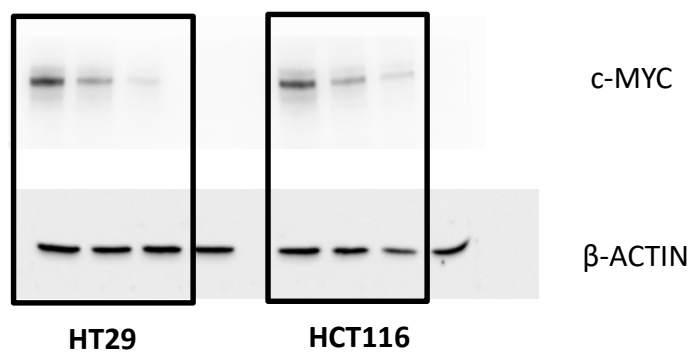

**B**

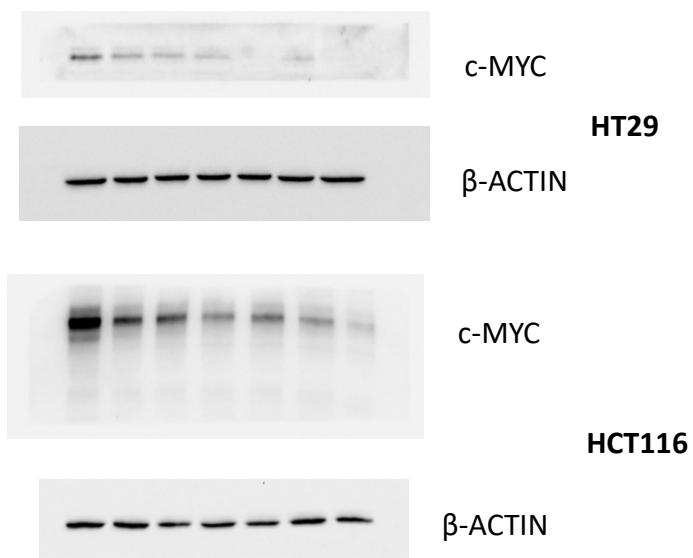

**C**

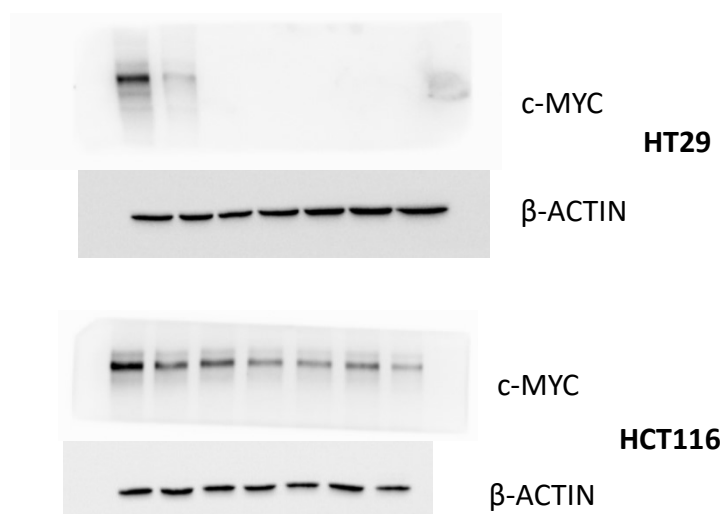

**J**

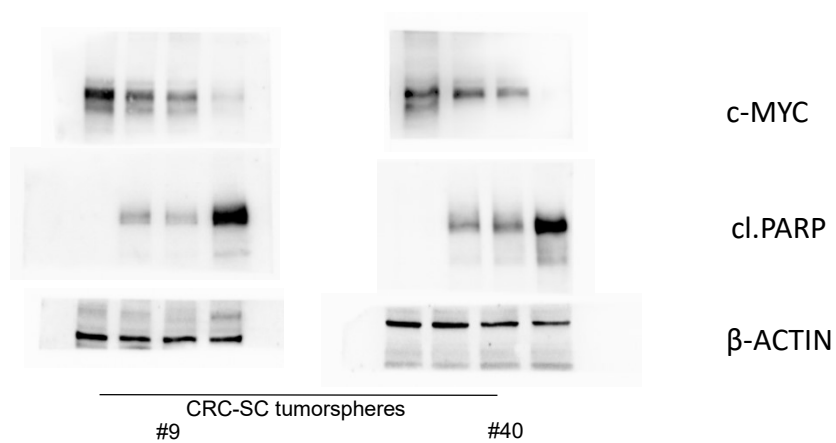



**Figure 5 Original blots**

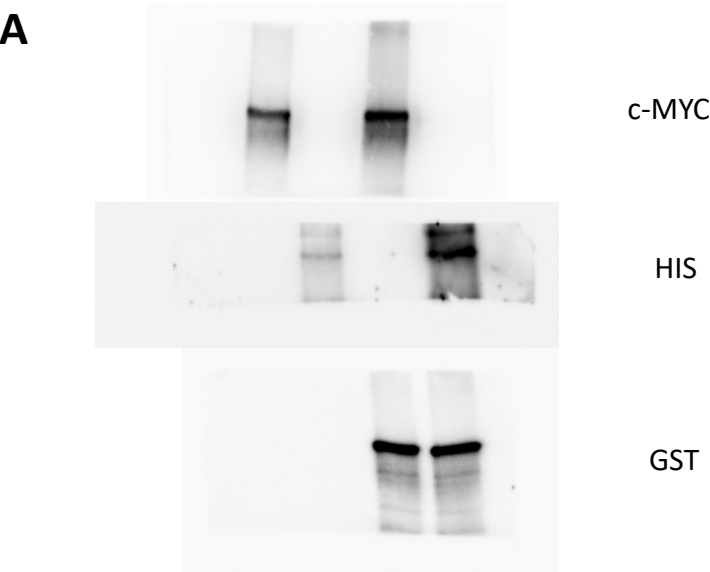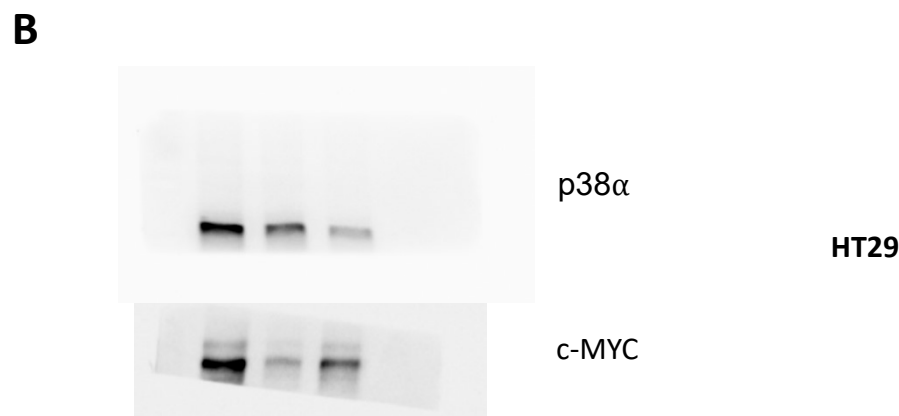

## Supplementary Figure S1 Original blots

**A**

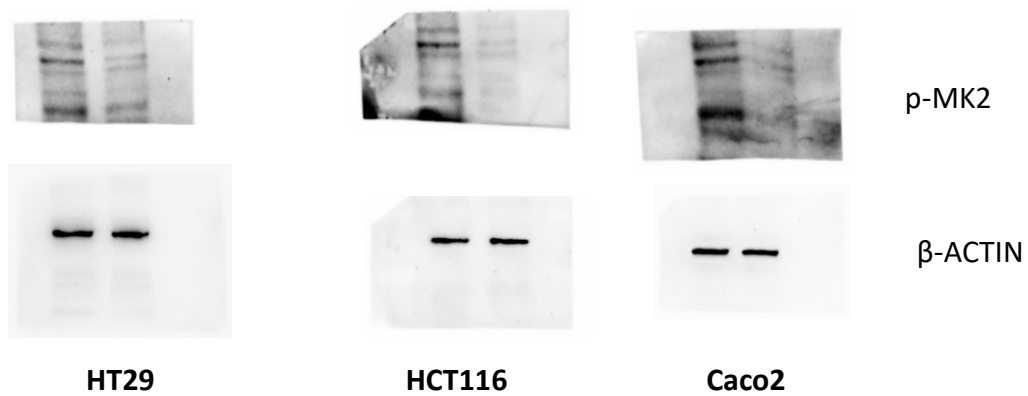

**B**

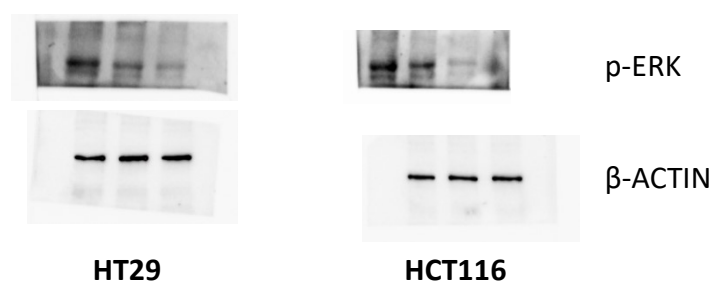

Supplementary Figure S2 Original blots

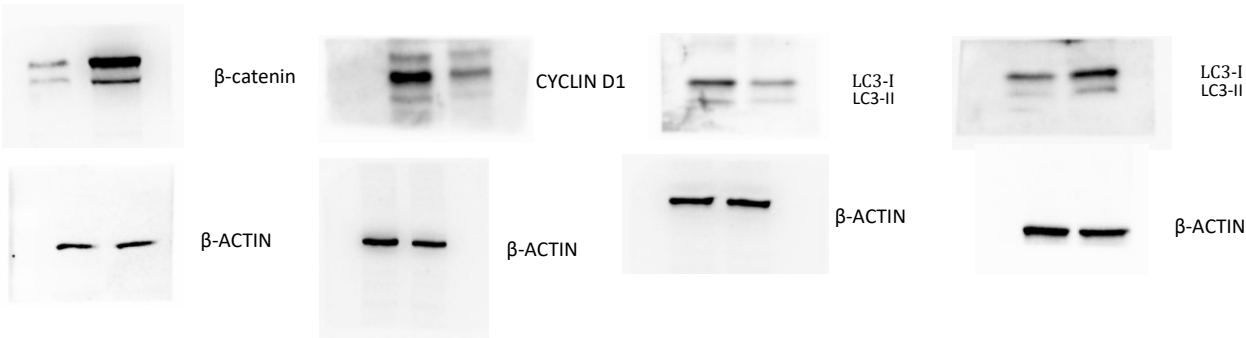

Supplement: s1 [file s1]
